# Supplementary material for: Multiplex PCR method for MinION and Illumina sequencing of Zika and other virus genomes directly from clinical samples
Source: Springer Nature journal article supplement (doi:10.1038/nprot.2017.066), 2017-05-24
Supplement: 41596_2017_BFnprot2017066_MOESM1_ESM.pdf [file 41596_2017_BFnprot2017066_MOESM1_ESM.pdf]

## SUPPLEMENTARY INFORMATION

**Supplementary Table 1** | Zika virus “ZikaAsian” scheme used by ZiBRA project generated by the Primal Scheme software <sup>15</sup>.

| Name              | Sequence                 | Pool |
|-------------------|--------------------------|------|
| ZIKA_400_1_LEFT   | GACAGTTCGAGTTTGAAGCGAAAG | 1    |
| ZIKA_400_1_RIGHT  | AGTATGCACTCCCACGTCTAGT   | 1    |
| ZIKA_400_2_LEFT   | AAGAAAGATCTGGCTGCCATGC   | 2    |
| ZIKA_400_2_RIGHT  | TGATTCCAACCAGGTTTGCAC    | 2    |
| ZIKA_400_3_LEFT   | AGATGACGTCGATTGTTGGTGC   | 1    |
| ZIKA_400_3_RIGHT  | TACGGTGACACAACCTCCATGT   | 1    |
| ZIKA_400_4_LEFT   | TCAGGTGCATAGGAGTCAGCAA   | 2    |
| ZIKA_400_4_RIGHT  | GGAGCCATGAACTGACAGCATT   | 2    |
| ZIKA_400_5_LEFT   | AGAACGTTAGTGGACAGAGGCT   | 1    |
| ZIKA_400_5_RIGHT  | TGTGCGTCCTTGAACCTACCA    | 1    |
| ZIKA_400_6_LEFT   | TTGATTGTGAACCGAGGACAGG   | 2    |
| ZIKA_400_6_RIGHT  | CCATCTGTCCCTGCGTACTGTA   | 2    |
| ZIKA_400_7_LEFT   | TGAAGGGCGTGCATACTCCTT    | 1    |
| ZIKA_400_7_RIGHT  | CGCCTCCAACCTGATCCAAAGTC  | 1    |
| ZIKA_400_8_LEFT   | GGGAGAAGAAGATCACCCACCA   | 2    |
| ZIKA_400_8_RIGHT  | TTGACTGCTGCTGCCAATCTAC   | 2    |
| ZIKA_400_9_LEFT   | GCCTTAGGGGGAGTGTGATCT    | 1    |
| ZIKA_400_9_RIGHT  | GAGTGGGCATTCCTTCAGTGTG   | 1    |
| ZIKA_400_10_LEFT  | ACGGTCGTTGTGGGATCTGTAA   | 2    |
| ZIKA_400_10_RIGHT | GTGGGACTTTGGCCATTACAT    | 2    |
| ZIKA_400_11_LEFT  | CAGCCGTTATTGGAACAGCTGT   | 1    |
| ZIKA_400_11_RIGHT | CCTGGGCCTTATCTCCATTCCA   | 1    |
| ZIKA_400_12_LEFT  | CACTAAGGTCCACGTGGAGGAA   | 2    |
| ZIKA_400_12_RIGHT | TATCAGCGCCAGATGAGCTACA   | 2    |
| ZIKA_400_13_LEFT  | TGGCAGTGCTGGTAGCTATGAT   | 1    |
| ZIKA_400_13_RIGHT | AGAGAGAGGAGCATAAACCCCC   | 1    |
| ZIKA_400_14_LEFT  | CAATGGTTTTGCTTTGGCCTGG   | 2    |
| ZIKA_400_14_RIGHT | TTTCCCATGTGATGTCACCTGC   | 2    |
| ZIKA_400_15_LEFT  | CCCTAGCGAAGTACTCACAGCT   | 1    |
| ZIKA_400_15_RIGHT | TACACTCCATCTGTGGTCTCCC   | 1    |
| ZIKA_400_16_LEFT  | GTGGCATGAACCCAATAGCCAT   | 2    |
| ZIKA_400_16_RIGHT | GCTCCAATGTCCCCATCCTTTG   | 2    |
| ZIKA_400_17_LEFT  | GTGGTCCATGGAAGCTAGATGC   | 1    |
| ZIKA_400_17_RIGHT | CCTCTAAGGGCCTCCTCATT     | 1    |
| ZIKA_400_18_LEFT  | CTGTTGAGTGCTTCGAGCCTTC   | 2    |

|                   |                        |   |
|-------------------|------------------------|---|
| ZIKA_400_18_RIGHT | TGGTGAGTTGGAGTCCGGAAAT | 2 |
| ZIKA_400_19_LEFT  | TATGGATGAGGCCACTTCACA  | 1 |
| ZIKA_400_19_RIGHT | GCCATCAAGTATGACCGGCTTT | 1 |
| ZIKA_400_20_LEFT  | GGCTGGAAAACGGGTCATACAG | 2 |
| ZIKA_400_20_RIGHT | CCTTTGCTCCGTCCTAAGCTTG | 2 |
| ZIKA_400_21_LEFT  | AGAGACTGACGAAGACCATGCA | 1 |
| ZIKA_400_21_RIGHT | CTCCAAAAGCCGCTCCTCTTTT | 1 |
| ZIKA_400_22_LEFT  | TGGACCAGACACGGAGAGAAAA | 2 |
| ZIKA_400_22_RIGHT | ATTCTGGCTGGCTCAATTTCCG | 2 |
| ZIKA_400_23_LEFT  | CGTCTTGATGAGGAACAAGGGC | 1 |
| ZIKA_400_23_RIGHT | AAGTGGTCACTGCATGTTGGAC | 1 |
| ZIKA_400_24_LEFT  | TAATGGGAAGGAGAGAGAGGGG | 2 |
| ZIKA_400_24_RIGHT | TCTCCACTTGGGGGTCAATTGT | 2 |
| ZIKA_400_25_LEFT  | CCCTGACCCTAATAGTGGCCAT | 1 |
| ZIKA_400_25_RIGHT | CCTTCCATTTCTCTCCAGGGT  | 1 |
| ZIKA_400_26_LEFT  | ACTGGAACCTCTACAGCCAC   | 2 |
| ZIKA_400_26_RIGHT | ACCAGGCCTCCTTTTGTGTAT  | 2 |
| ZIKA_400_27_LEFT  | AGTGCAAAGCTGAGATGGTTGG | 1 |
| ZIKA_400_27_RIGHT | ATGTGTAGAGTTGCGGGAGAGT | 1 |
| ZIKA_400_28_LEFT  | GGTGGGGGATTGGCTTGAAAAA | 2 |
| ZIKA_400_28_RIGHT | GGGCCTCATAGCTTCCATGGTA | 2 |
| ZIKA_400_29_LEFT  | AGGATGTGAATCTCGGCTCTGG | 1 |
| ZIKA_400_29_RIGHT | ATGCTGCATTGCTACGAACCTT | 1 |
| ZIKA_400_30_LEFT  | AAAAGTGGACACTAGGGTGCCA | 2 |
| ZIKA_400_30_RIGHT | TAATCCCAGCCCTTCAACACCA | 2 |
| ZIKA_400_31_LEFT  | ACAAGGGGAATTTGGAAAGGCC | 1 |
| ZIKA_400_31_RIGHT | CGTAAGTGACAACCTGTCCGCT | 1 |
| ZIKA_400_32_LEFT  | AAATGGAAAAAGGGCACAGGGC | 2 |
| ZIKA_400_32_RIGHT | TGTCCATCCAGTTGAGGGTTT  | 2 |
| ZIKA_400_33_LEFT  | CAAACGAATGGCAGTCAGTGGA | 1 |
| ZIKA_400_33_RIGHT | ATCCCACTCTGTTCCACACCA  | 1 |
| ZIKA_400_34_LEFT  | ATTTCCACAGAAGGGACCTCCG | 2 |
| ZIKA_400_34_RIGHT | TGACTAGCAGGCCTGACAACAT | 2 |
| ZIKA_400_35_LEFT  | ACCACCTGGGCTGAGAACATTA | 1 |
| ZIKA_400_35_RIGHT | ACCACTAGTCCCTTCTTGAG   | 1 |

**Supplementary Table 2 |** Chikungunya virus “ChikAsiaECSA” 400 nt scheme.

| Name               | Sequence                | Pool |
|--------------------|-------------------------|------|
| CHIK_400_1_LEFT_3  | CTTTTTGAAGGCCCTGCAACGT  | 1    |
| CHIK_400_1_RIGHT_3 | ACGGCCATCACCTCTTGTAAAGT | 1    |

|                     |                          |   |
|---------------------|--------------------------|---|
| CHIK_400_2_LEFT_0   | TGTCGGACAGGAAGTACCACTG   | 2 |
| CHIK_400_2_RIGHT_0  | CTCATCCGCCCAATTTGTCGAG   | 2 |
| CHIK_400_3_LEFT_0   | GTA CTGGGTAGGGTTGCACACA  | 1 |
| CHIK_400_3_RIGHT_0  | CACACGAAACCACTGTGTCACA   | 1 |
| CHIK_400_4_LEFT_4   | TCGGTGTTCATCTAAAGGGCA    | 2 |
| CHIK_400_4_RIGHT_4  | CTTCATGGTGTTCTGTTCCGT    | 2 |
| CHIK_400_5_LEFT_0   | GGTGGGGCTGAACCAGAGAATA   | 1 |
| CHIK_400_5_RIGHT_0  | TACAAAGCTGTGAATTCGGCC    | 1 |
| CHIK_400_6_LEFT_4   | AAGCAGAAAACACACACGGTCT   | 2 |
| CHIK_400_6_RIGHT_4  | GCGCCTCTCGGAGTCTCTATTA   | 2 |
| CHIK_400_7_LEFT_0   | TACAGGCAGCACAGGAAGATGT   | 1 |
| CHIK_400_7_RIGHT_0  | TGGAAGTCTTCGGGCGAAATTG   | 1 |
| CHIK_400_8_LEFT_1   | GGAGCAAGTGAAGACGTGTACG   | 2 |
| CHIK_400_8_RIGHT_1  | TATATGGACAAGCGGGCGAAT    | 2 |
| CHIK_400_9_LEFT_0   | TGCAAGAAGGAAGAAGCTGCAG   | 1 |
| CHIK_400_9_RIGHT_0  | AAGGCGATCAAGGCAAGTAACG   | 1 |
| CHIK_400_10_LEFT_0  | ATCTGCACGTACGGTTGATTCTG  | 2 |
| CHIK_400_10_RIGHT_0 | GGTTTTGTTGAGCCCGTAGTGT   | 2 |
| CHIK_400_11_LEFT_0  | GGCAAATGCGCACTACGAATG    | 1 |
| CHIK_400_11_RIGHT_0 | CCTCCGTACGCGTTAGGAGTA    | 1 |
| CHIK_400_12_LEFT_1  | AGGAGTTTACGCAGTTAGGCAAA  | 2 |
| CHIK_400_12_RIGHT_1 | TTCATTCAGGGCTACTTCGGGT   | 2 |
| CHIK_400_13_LEFT_0  | TGGTCCCTATCCTCGAAACAGC   | 1 |
| CHIK_400_13_RIGHT_0 | TCCTGGTAGTCACGCAGATCTG   | 1 |
| CHIK_400_14_LEFT_0  | TGAGGCAGCGTCCATTCTAGAA   | 2 |
| CHIK_400_14_RIGHT_0 | ATACCTACCAAGTGTGCCGGT    | 2 |
| CHIK_400_15_LEFT_4  | ACCTTGCACTGCCTACTAAGAGA  | 1 |
| CHIK_400_15_RIGHT_4 | ACATGGTGGTTTCAATGCTCTGG  | 1 |
| CHIK_400_16_LEFT_0  | TCAGAGCATACGGTTACGCAGA   | 2 |
| CHIK_400_16_RIGHT_0 | TTTGCGGTTCTACTGGTGTTG    | 2 |
| CHIK_400_17_LEFT_0  | GACGGTGGTTGCAAGGCAGTAT   | 1 |
| CHIK_400_17_RIGHT_0 | TCCATGGCTGTAAAGAGGTGGT   | 1 |
| CHIK_400_18_LEFT_0  | ACCTCTCTCCACAGGTGTA      | 2 |
| CHIK_400_18_RIGHT_0 | GCCTCTATTTGCTTTGGCCACA   | 2 |
| CHIK_400_19_LEFT_0  | AAGGGACACGTTTTCCACCAGAC  | 1 |
| CHIK_400_19_RIGHT_0 | GGAGCATTTGACTTTTTGCACTCC | 1 |
| CHIK_400_20_LEFT_0  | CGACTTCGCATGAACCATGTCA   | 2 |
| CHIK_400_20_RIGHT_0 | GTATGTATCGCCCCGTCGTCTA   | 2 |
| CHIK_400_21_LEFT_0  | AGTTTGATCTAAGCGCCGATGG   | 1 |
| CHIK_400_21_RIGHT_0 | AAATGTGATGGGGAACGTCTCG   | 1 |

|                     |                         |   |
|---------------------|-------------------------|---|
| CHIK_400_22_LEFT_0  | CGCGTGACACAGCTATTCCTT   | 2 |
| CHIK_400_22_RIGHT_0 | TGGCGTACCGACTTCTGTTGTA  | 2 |
| CHIK_400_23_LEFT_0  | ACACGGACGACGAGTTATGACT  | 1 |
| CHIK_400_23_RIGHT_0 | GACAATCGGACGTTGATCGGAG  | 1 |
| CHIK_400_24_LEFT_0  | TAATGGCAGAGACCCCGAAAGT  | 2 |
| CHIK_400_24_RIGHT_0 | TGTGTTCTGGAATGGGGAAGGT  | 2 |
| CHIK_400_25_LEFT_0  | CGAGCGACATTCAATCCGCAA   | 1 |
| CHIK_400_25_RIGHT_0 | CGGCAGCAGATTATGGGTCTT   | 1 |
| CHIK_400_26_LEFT_3  | GAAGAATTTGCTGCCAGCCCTA  | 2 |
| CHIK_400_26_RIGHT_3 | GTGCGGCTATAATGGCATCGAA  | 2 |
| CHIK_400_27_LEFT_0  | TTAGGAGATTGAACGCCGTCCT  | 1 |
| CHIK_400_27_RIGHT_0 | GTCAGACGATCTTCCAACACCC  | 1 |
| CHIK_400_28_LEFT_2  | GACAGGTACGCGCTTCAAGTTC  | 2 |
| CHIK_400_28_RIGHT_2 | CGCTAACGGTTTGCCAGTTTA   | 2 |
| CHIK_400_29_LEFT_0  | AGCTCCCTACTTTTGTGGAGGG  | 1 |
| CHIK_400_29_RIGHT_0 | GACCGCCGTACAAGTTATGAC   | 1 |
| CHIK_400_30_LEFT_0  | TAATGTCCATGGCCACCTTTC   | 2 |
| CHIK_400_30_RIGHT_0 | TATTCTCCGATTCTTGC       | 2 |
| CHIK_400_31_LEFT_0  | CAACTTGCCAGCTGATCTCAG   | 1 |
| CHIK_400_31_RIGHT_0 | ATCGATGGTCCCCTTACGTGT   | 1 |
| CHIK_400_32_LEFT_0  | TAAGGTAACAGGTTACGCGTGC  | 2 |
| CHIK_400_32_RIGHT_0 | TACGGGCTCCTTATTAGCTCC   | 2 |
| CHIK_400_33_LEFT_2  | GACCGATCTTCGACAACAAGGG  | 1 |
| CHIK_400_33_RIGHT_2 | GCGTCGGGAGAACATGTTAAG   | 1 |
| CHIK_400_34_LEFT_0  | GAGAAAACCTTGCGCATGCTTG  | 2 |
| CHIK_400_34_RIGHT_0 | CTGCTGGCATGTGATTGCCAT   | 2 |
| CHIK_400_35_LEFT_0  | CCAGGTTTCCTTGCAAATCGGA  | 1 |
| CHIK_400_35_RIGHT_0 | GTACGTGCTGCAAGGTAGTTC   | 1 |
| CHIK_400_36_LEFT_1  | CATGTACGCACCCATTCACCA   | 2 |
| CHIK_400_36_RIGHT_1 | GGTCCCCGAATTCAGCATTACG  | 2 |
| CHIK_400_37_LEFT_0  | CTGCAAGGTCGATCAATGCCAT  | 1 |
| CHIK_400_37_RIGHT_0 | TCATTGTTACCCACGTGACCT   | 1 |
| CHIK_400_38_LEFT_0  | AGTGGGTGACGCATAAGAAGGA  | 2 |
| CHIK_400_38_RIGHT_0 | TGGTGTGAGTTCGTACGGTGTA  | 2 |
| CHIK_400_39_LEFT_0  | ATACTCTGTCGATGGTGGGTG   | 1 |
| CHIK_400_39_RIGHT_0 | CGGGATCACTGTTACGTGTTTCG | 1 |
| CHIK_400_40_LEFT_0  | TTTTTAGCCGTAAGCGTTCG    | 2 |
| CHIK_400_40_RIGHT_0 | ATTTTCGGTGTGCGAGAAGCAG  | 2 |
| CHIK_400_41_LEFT_0  | GCGGTACAGCAGAGTGAAGGA   | 1 |
| CHIK_400_41_RIGHT_0 | GTCGCCTTTGTACACCACGATT  | 1 |

|                     |                        |   |
|---------------------|------------------------|---|
| CHIK_400_42_LEFT_0  | CCATGCCGTCACAGTTAAGGAC | 2 |
| CHIK_400_42_RIGHT_0 | AGTTCATCGCTCTTACCGGGTT | 2 |
| CHIK_400_43_LEFT_0  | ATTGGCTAAAAGAACGAGGGGC | 1 |
| CHIK_400_43_RIGHT_0 | TTCCCGAATAGTGACGGCGTTA | 1 |
| CHIK_400_44_LEFT_0  | GCACCCATTCTCAGACTTTGG  | 2 |
| CHIK_400_44_RIGHT_0 | CCTGCTAAACGACACGCATAGC | 2 |
